# Supplementary material for: Synergistic antitumor and radiosensitizing effects of α -sulfoquinovosyl-acylpropanediol (SQAP) via PI3K/Akt inhibition and DNA repair impairment in glioblastoma
Source: Research Square preprint supplement (doi:10.21203/rs.3.rs-6896488/v1), 2025-06-18
Supplement: Supplementary file 1 [file 1e82cf230e19837058fc5389.docx]

***The list of cell lines***

**・**U87MG cells : the American Type Culture Collection (ATCC; Manassas, VA, USA).

・U251 cells : the European Collection of Authenticated Cell Cultures (ECACC; London, UK)

・T98G cells : the JCRB Cell Bank (Osaka, Japan)

・GL261 cells: National Cancer Institute (Frederick, MD, USA).

***Primary antibodies used for*** ***Immunoblotting***

1. rabbit anti-phospho-Akt (Ser473) (4058S, Cell Signaling),
2. rabbit anti-Akt (9272S, Cell Signaling)
3. rabbit anti-phospho-PI3 kinase p85 (Tyr458)/p55 (Tyr199) (4228S, Cell Signaling)
4. rabbit anti-PI3 kinase (4292S, Cell Signaling)
5. rabbit anti-BAX (N-terminus) (ABC11, Sigma-Aldrich)
6. rabbit anti-Bcl-2 (ab182858, Abcam)
7. rabbit anti-cyclinB1 (4138S, Cell Signaling)
8. rabbit anti-HIF-1 alpha (ab2185, Abcam)
9. rabbit anti-PARP (46D11) (9532S, Cell Signaling)
10. mouse anti-β actin antibody (A2228, Sigma-Aldrich).

***Primer sequences used for Quantitative Real‑Time Reverse Transcription Polymerase Chain Reaction***

| **Gene** | **Primer sequence** | |
| --- | --- | --- |
| BAX | Forward | 5′-CCAAGAAGCTGAGCGAGTGT-3′ |
| Reverse | 5′-CCGGAGGAAGTCCAATGTC-3′ |
| Bcl-2 | Forward | 5′-TCCCTCGCTGCACAAATACTC-3′ |
| Reverse | 5′-ACGACCCGATGGCCATAGA-3′ |
| p21 | Forward | 5′-AGTCAGTTCCTTGTGGAGCC-3′ |
| Reverse | 5′-CATGGGTTCTGACGGACAT-3′ |
| cyclin D1 | Forward | 5′-AGCTCCTGTGCTGCGAAGTGGAAAC-3′ |
| Reverse | 5′-AGTGTTCAATGAAATCGTGCGGGGT-3′ |
| VEGF | Forward | 5′-TCTACCTCCACCATGCCAACT-3′ |
| Reverse | 5′-GATGATTCTGCCCTCCTCCTT-3′ |
| β-actin | Forward | 5′-CATCCGTAAAGACCTCTATGCCAAC-3′ |
| Reverse | 5′-ATGGAGCCACCGATCCACA-3′ |
