# Supplementary material for: Synergistic antitumor and radiosensitizing effects of α -sulfoquinovosyl-acylpropanediol (SQAP) via PI3K/Akt inhibition and DNA repair impairment in glioblastoma
Source: Research Square preprint supplement (doi:10.21203/rs.3.rs-6896488/v1), 2025-06-18
Supplement: Supplementary file 1 [file 44050e14aff682cb1ab7bfc5.pdf]

## Online Resource 5

### q-PCR and immunoblotting results for p21, cyclin D1, and cyclinB including in hypoxic conditions

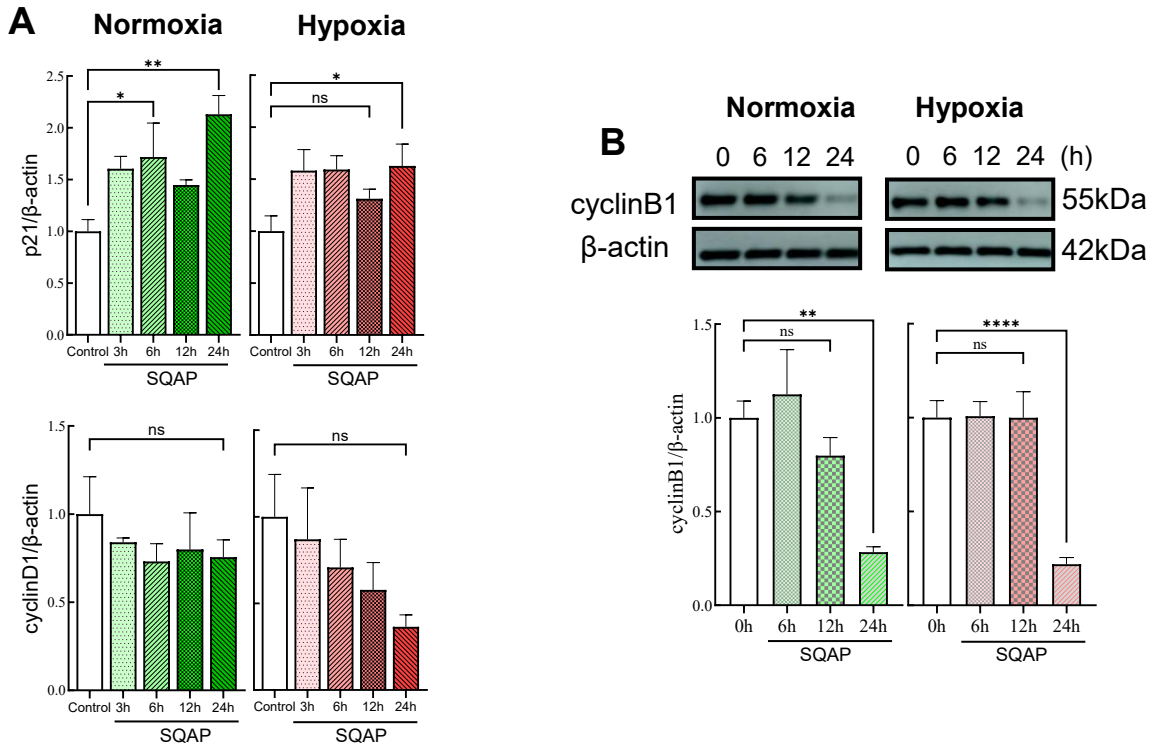

(A) Graphs showing the result of quantitative RT-PCR (qRT-PCR) analysis in U87 treated with 150 $\mu$ M SQAP under normoxia and hypoxia. Each column showing the mRNA levels of p21 and cyclinD1 at different time course (3, 6, 12 and 24h). Data are shown as mean  $\pm$  SEM (n = 5). \*p < 0.05, \*\*p < 0.01, vs. Control groups. (Dunnett's test)

(B) Representative images of immunoblots and graphs showing the time course of expression of cyclinB1 in U87 cells treated with 150 $\mu$ M SQAP under normoxia and hypoxia. Data are shown as mean  $\pm$  SEM (n = 6). \*\*p < 0.01, \*\*\*\*p < 0.0001, vs. Control groups. (Dunnett's test)
