# Supplementary material for: Synergistic antitumor and radiosensitizing effects of α -sulfoquinovosyl-acylpropanediol (SQAP) via PI3K/Akt inhibition and DNA repair impairment in glioblastoma
Source: Research Square preprint supplement (doi:10.21203/rs.3.rs-6896488/v1), 2025-06-18
Supplement: Supplementary file 2 [file 8e332d74aa3e29078df1707b.pdf]

## Online Resource 4

### q-PCR and immunoblotting results for bax and bcl-2, including in hypoxic conditions

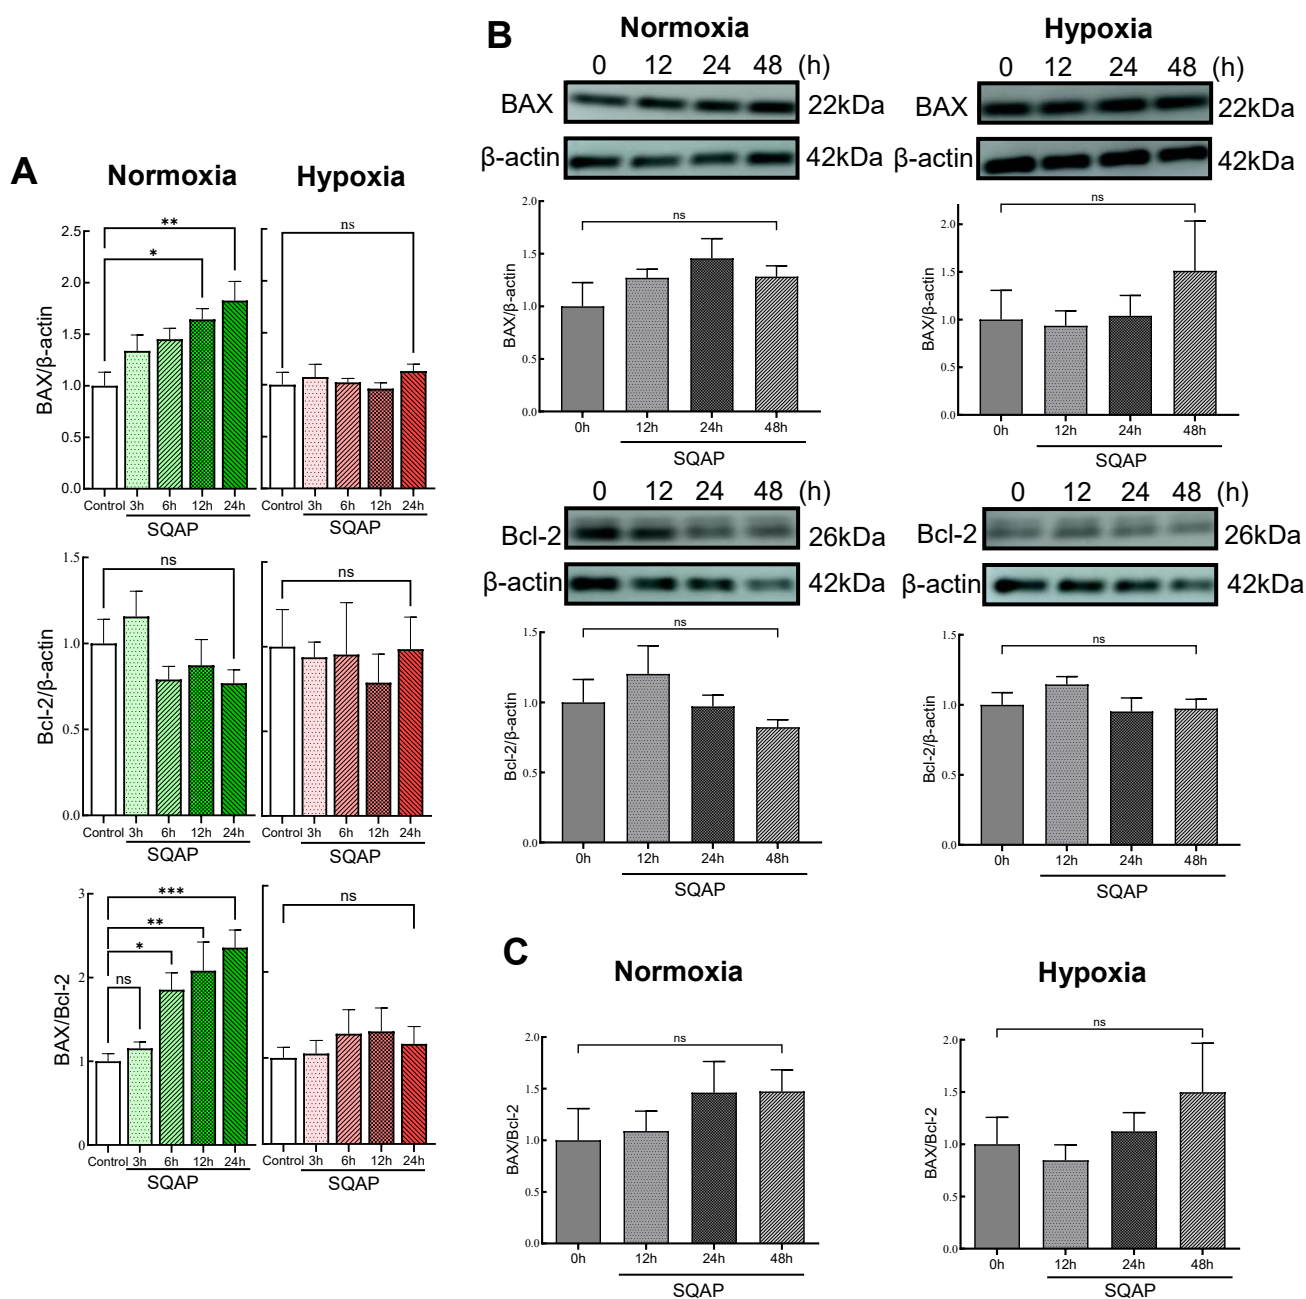

Changes in the mRNA levels and the expression of proteins that regulate apoptosis in human glioblastoma cells. (A) Graphs showing the result of quantitative RT-PCR (qRT-PCR) analysis in U87 treated with 150 $\mu$ M SQAP under normoxia and hypoxia. Each column showing the mRNA levels of BAX and Bcl-2 at different time course (3, 6, 12 and 24h). Data are shown as mean  $\pm$  SEM (n = 5). \* $p$  < 0.05, \*\* $p$  < 0.01, \*\*\* $p$  < 0.001 vs. Control groups (Dunnett's test). (B) Representative images of immunoblots and graphs showing the time course of expression of BAX and Bcl-2 in U87 cells treated with 150 $\mu$ M SQAP under normoxia and hypoxia. Data are shown as mean  $\pm$  SEM (n = 6). No significant (ns) difference was observed in any groups vs. Control groups (Dunnett's test) (C) Graphs showing the ratio of the expression of BAX to Bcl-2 in U87 cells treated with 150 $\mu$ M SQAP under normoxia and hypoxia.
